# Supplementary material for: High performance of a solid-state flexible asymmetric supercapacitor based on graphene films
Source: Royal Society of Chemistry journal article supplement (doi:10.1039/c2nr30991b), 2012-01-01
Supplement: c2nr30991b.pdf [file c2nr30991b.pdf]

Supplementary Information for

## High Performance of Solid-State Flexible Asymmetric Supercapacitor Based on Graphene Films

Bong Gill Choi,<sup>a</sup> Sung-Jin Chang,<sup>a</sup> Hyun-Wook Kang,<sup>b</sup> Chan Pil Park,<sup>b</sup> Hae Jin Kim,<sup>a,b</sup> Won Hi Hong,<sup>c</sup> SangGap Lee,<sup>\*a</sup> Yun Suk Huh<sup>\*a</sup>

<sup>a</sup>Division of Material Science, Korea Basic Science Institute, Daejeon, 305-333, Republic of Korea.

E-mail: yshuh@kbsi.re.kr, [sgl757@kbsi.re.kr](mailto:sgl757@kbsi.re.kr)

<sup>b</sup>Graduate School of Analytical Science and Technology, Chungnam National University, Daejeon, 305-764, Republic of Korea

<sup>c</sup>Department of Chem. & Biomolecular Eng. (BK 21), Korea Advanced Institute of Science and Technology, Daejeon 305-701, Republic of Korea

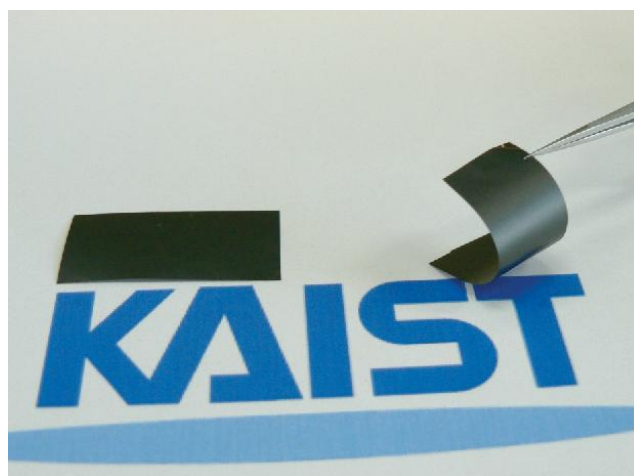

**Fig. S1** Photograph of IL-CMG and RuO<sub>2</sub>/IL-CMG films.

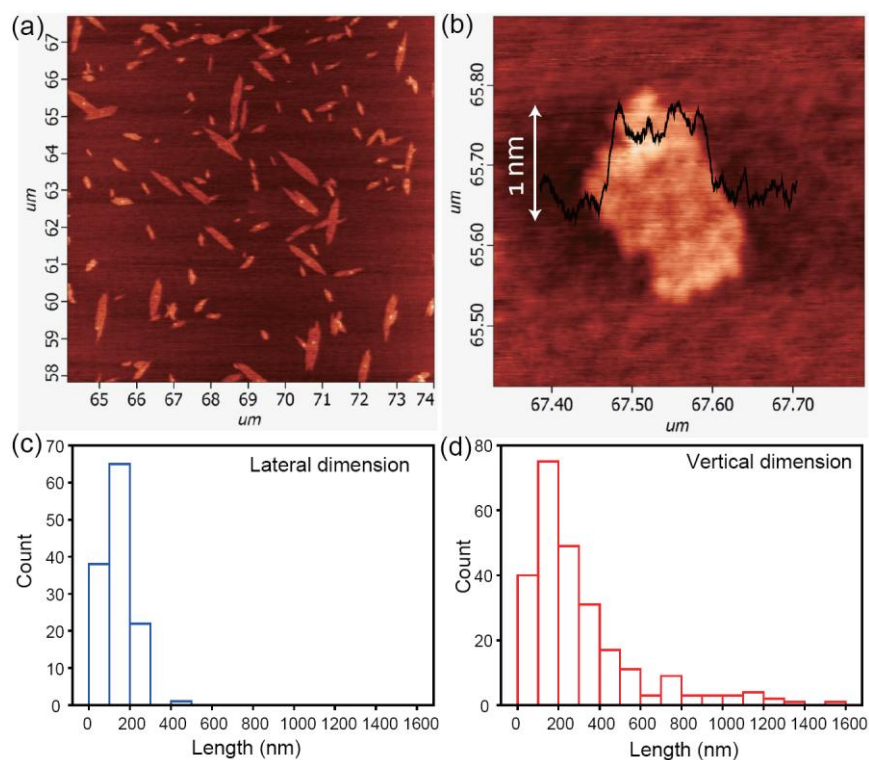

**Fig. S2** (a) and (b) AFM images of IL-CMG. (b) and (c) Size distributions of IL-CMG.

Based on AFM images, the size distribution was calculated to be 450.6 nm and 2.3  $\mu\text{m}$  for lateral and vertical dimensions of GO sheets and 138.4 nm and 474.3 nm for lateral and vertical dimensions of IL-CMG sheets. The significant decrease in lateral dimensions of IL-CMG sheets is attributed to the intrinsic character of Hummers method and excessive sonication treatment.

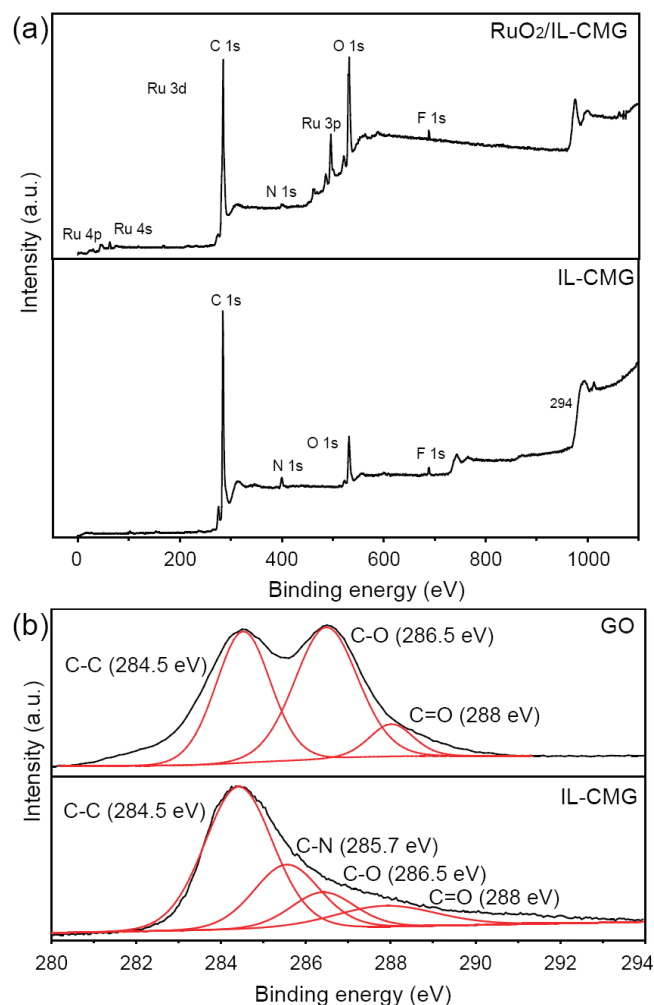

**Fig. S3** XPS spectra of RuO<sub>2</sub>/IL-CMG and IL-CMG films (Inset shows C 1s spectra of IL-CMG films.).

As shown in Fig. S3b, C 1s clearly shows the high level of oxidation state for GOs with the mainly separated three peaks at C–C (285.5 eV), C–O (287.4 eV), and C=O (288.4 eV). These peaks are in accordance with previous reports.<sup>1</sup> After functionalization with ILs and reduction reaction with hydrazine, most of C–O and C=O peaks were significantly weakened, indicating the reduction of oxygen containing groups. In addition, an additional peak assigned to C–N (285.7 eV) appeared due to the presence of N-atom containing IL molecules.<sup>2</sup> Although all of the oxygen containing groups were not reduced completely, dramatic reduction of the oxygen groups for IL-CMG compared to GOs implies the restoration of large domains of  $\pi$ -conjugated structure.<sup>2</sup> This partial removal of oxygen groups on functionalized CMGs was previously observed by other works.<sup>1,2</sup>

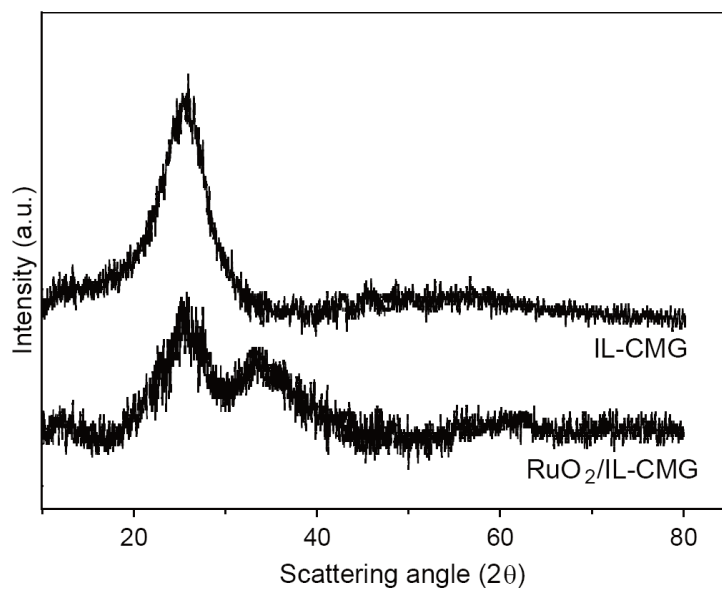

**Fig. S4** XRD patterns of RuO<sub>2</sub>/IL-CMG and IL-CMG films.

The peak at 24° in the XRD spectrum of IL-CMG composite films was observed. This peak was ascribed to an interlayer spacing of 0.36 nm in the CMG sheet.<sup>3</sup> The broad shoulder peak at around at 35° on RuO<sub>2</sub>/IL-CMG film indicates the amorphous structure of RuO<sub>2</sub>.

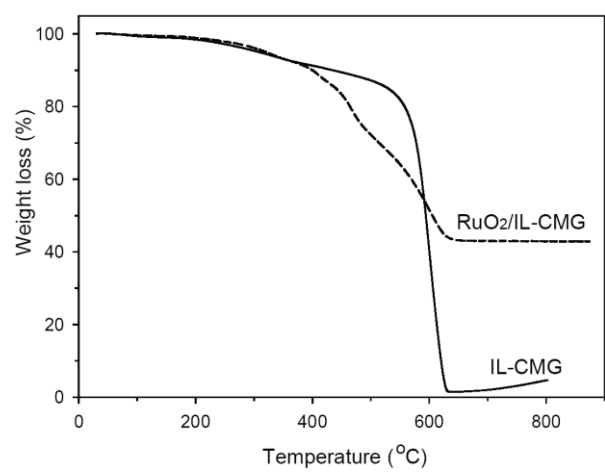

**Fig. S5** TGA curves of IL-CMG and RuO<sub>2</sub>/IL-CMG.

**Table S1.** Power density and energy density for the symmetric SC devices at different current densities (based on the total mass of the entire device).

|                                           |      |      |      |      |      |
|-------------------------------------------|------|------|------|------|------|
| Current density<br>(A g <sup>-1</sup> )   | 0.5  | 1    | 2    | 5    | 10   |
| Power density<br>(kW kg <sup>-1</sup> )   | 0.23 | 0.49 | 1.81 | 3.17 | 5.07 |
| Energy density<br>(W·h kg <sup>-1</sup> ) | 2.95 | 2.93 | 2.90 | 2.84 | 2.82 |

## References

- [1] B. G. Choi, H. Park, T. J. Park, M. H. Yang, J. S. Kim, S.-Y. Jang, N. S. Heo, S. Y. Lee, J. Kong and W. H. Hong, *ACS Nano*, 2010, **4**, 2910.
- [2] T. Y. Kim, H. Lee, J. Kim and K. S. Suh, *ACS Nano*, 2010, **4**, 1612.
- [3] K. Zhang, L. L. Zhang, X. S. Zhao and J. Wu, *Chem. Mater.*, 2010, **22**, 1392.
